# Supplementary material
Source: PubMed Central journal article supplement (PMC3366049)
Supplement: NIHMS366583-supplement-2.pdf [file NIHMS366583-supplement-2.pdf]

**a**

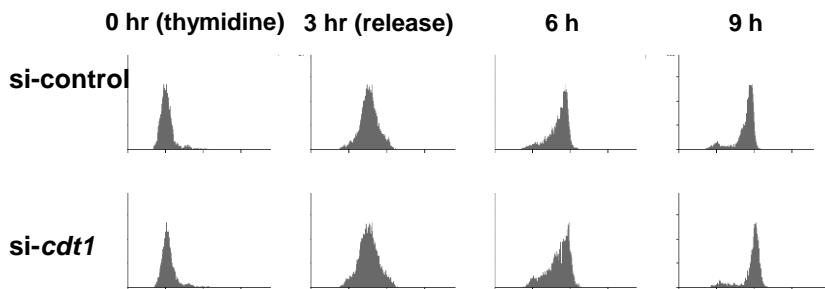

**b**

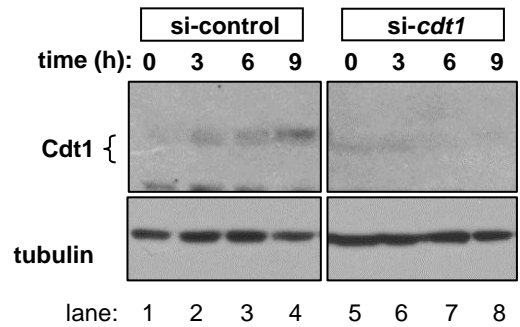

**c**

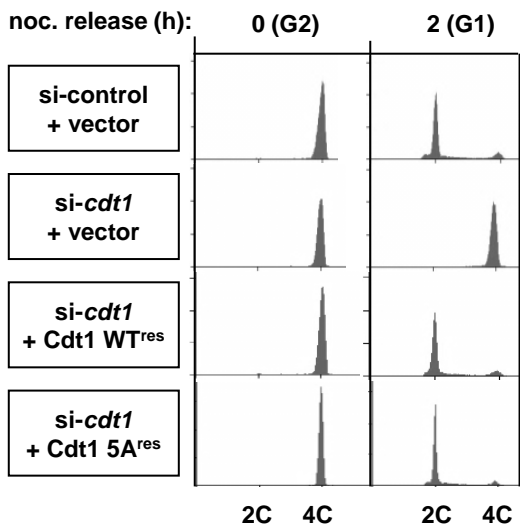

**d**

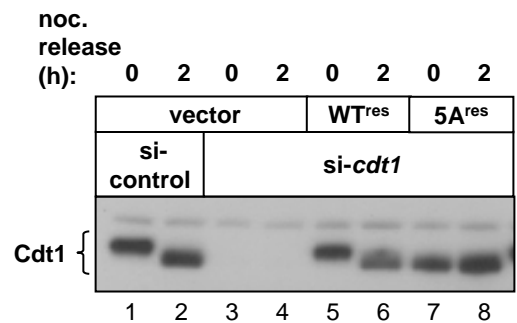

**e**

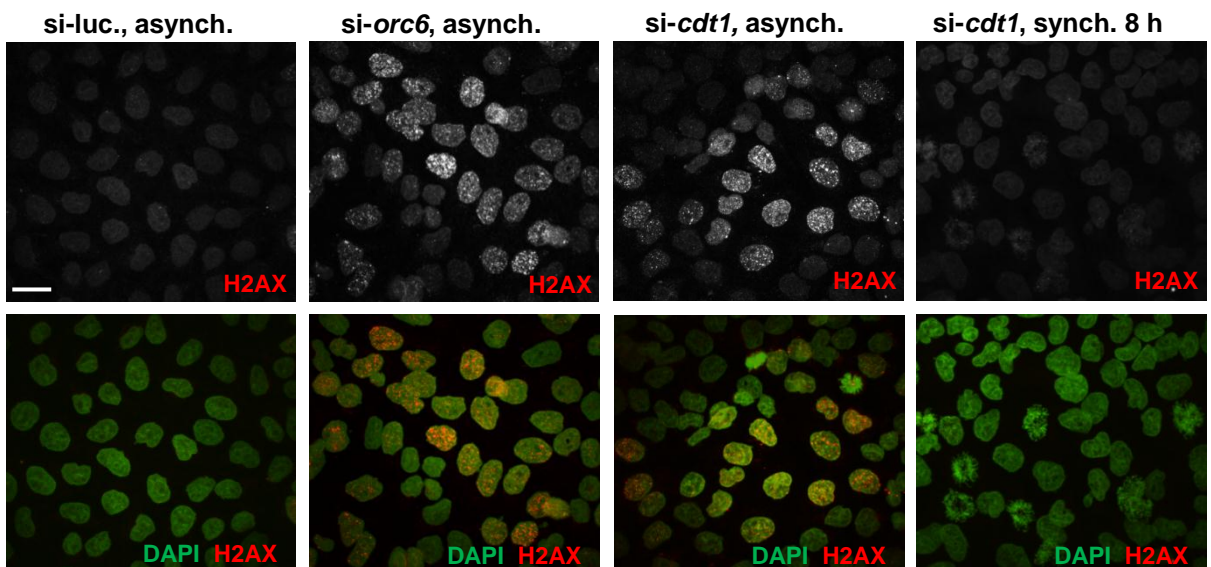

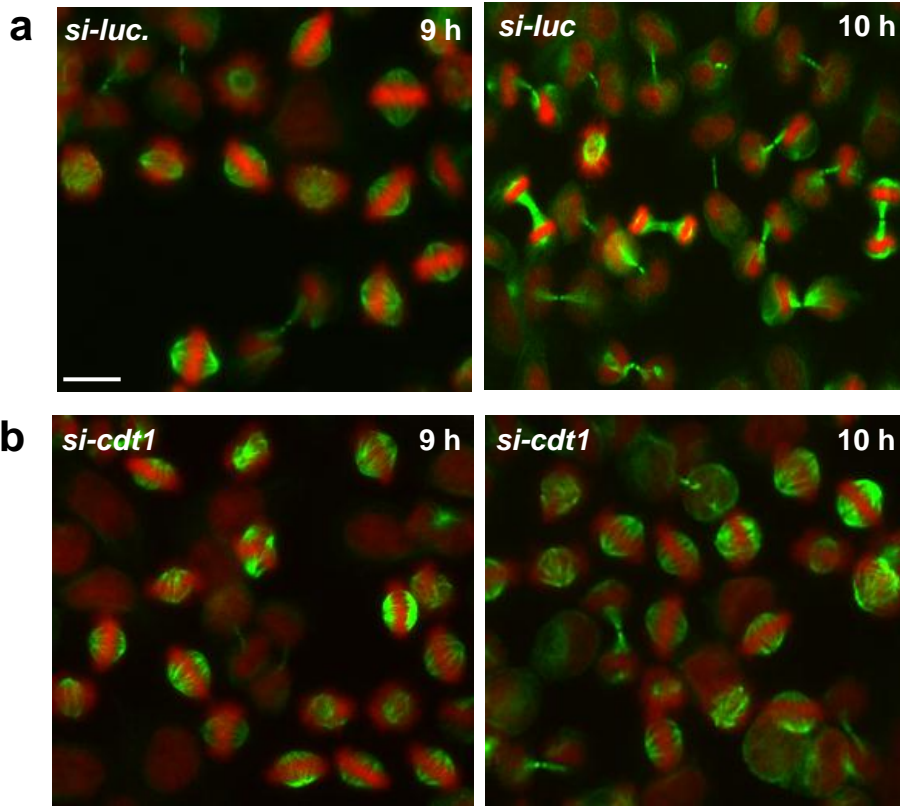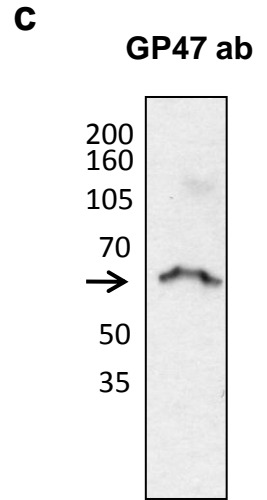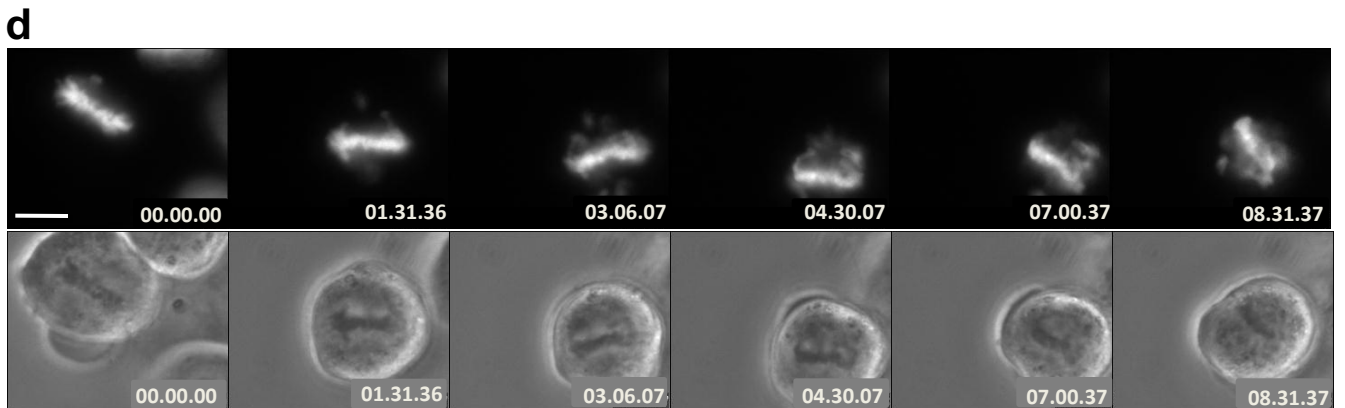

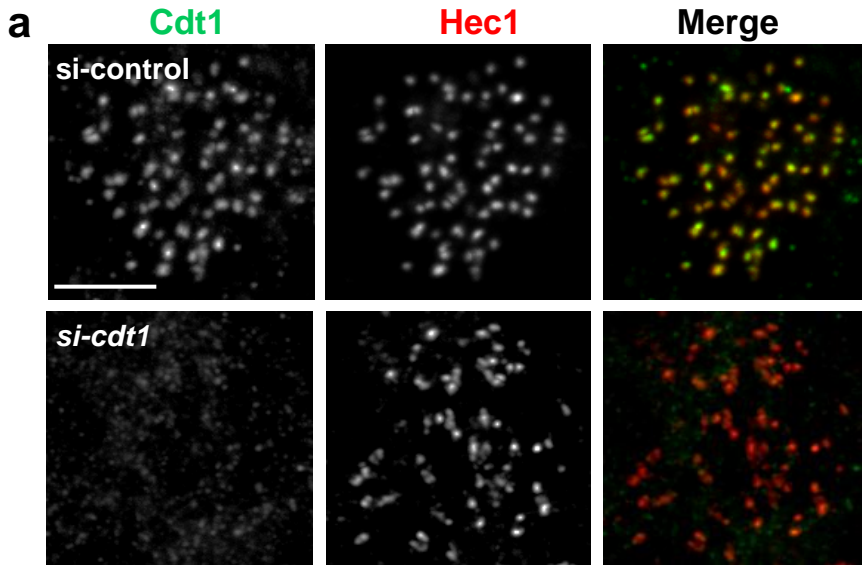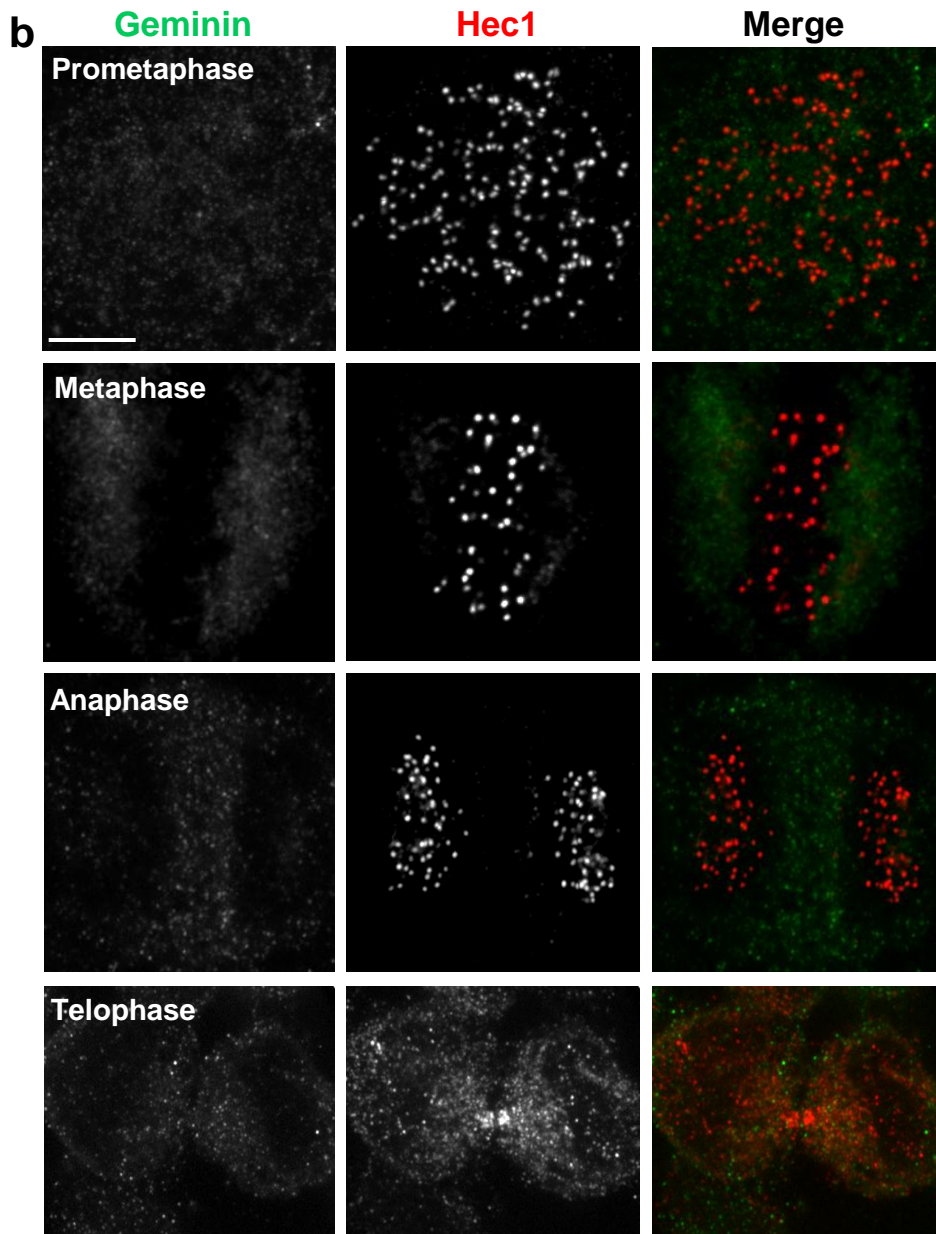

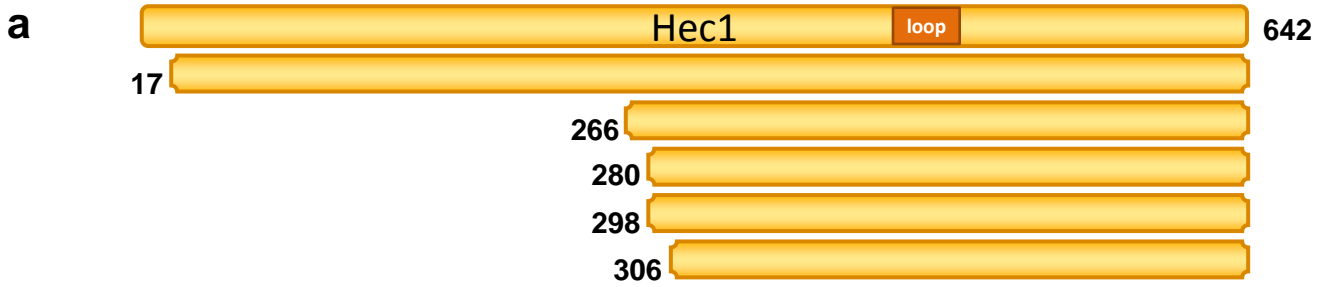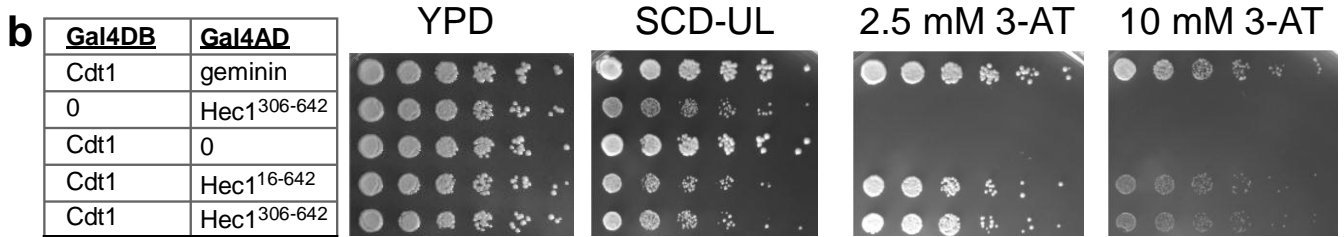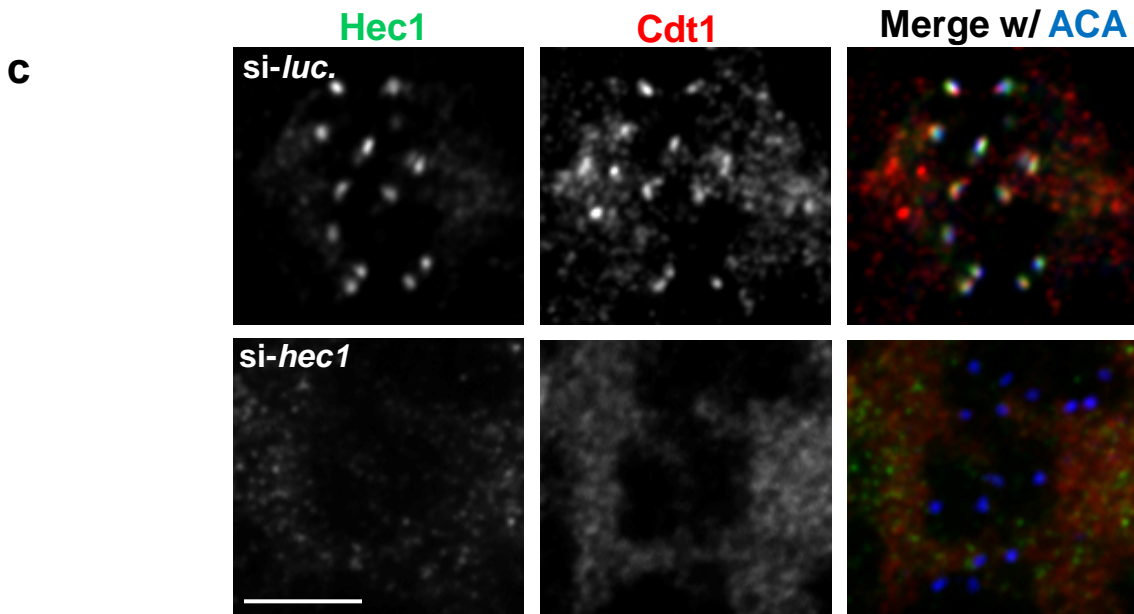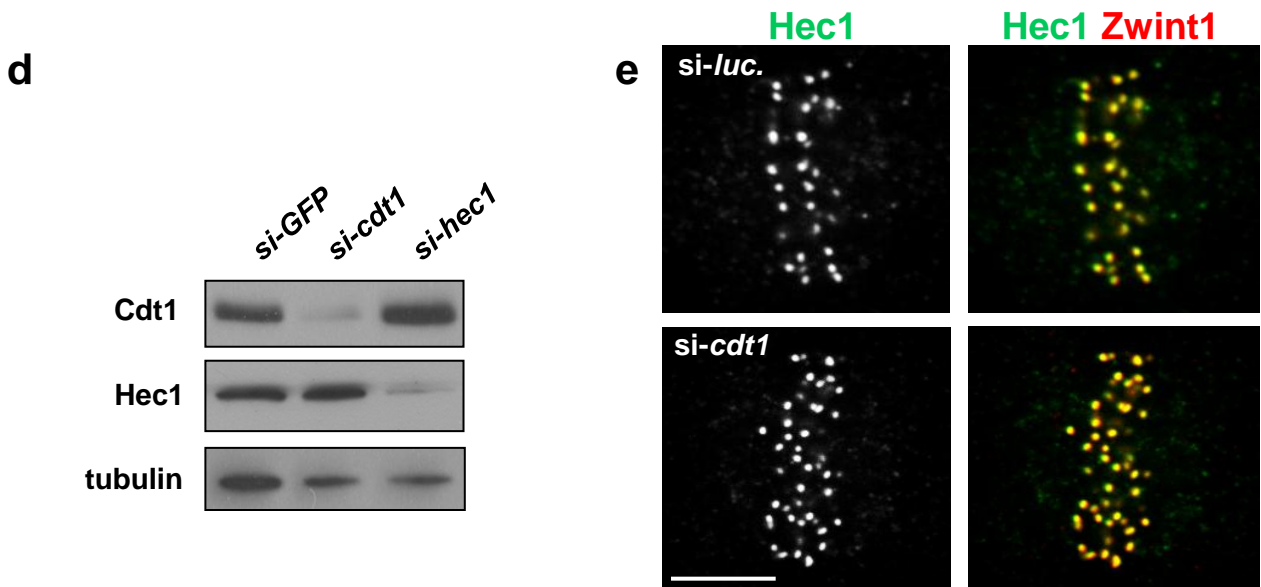

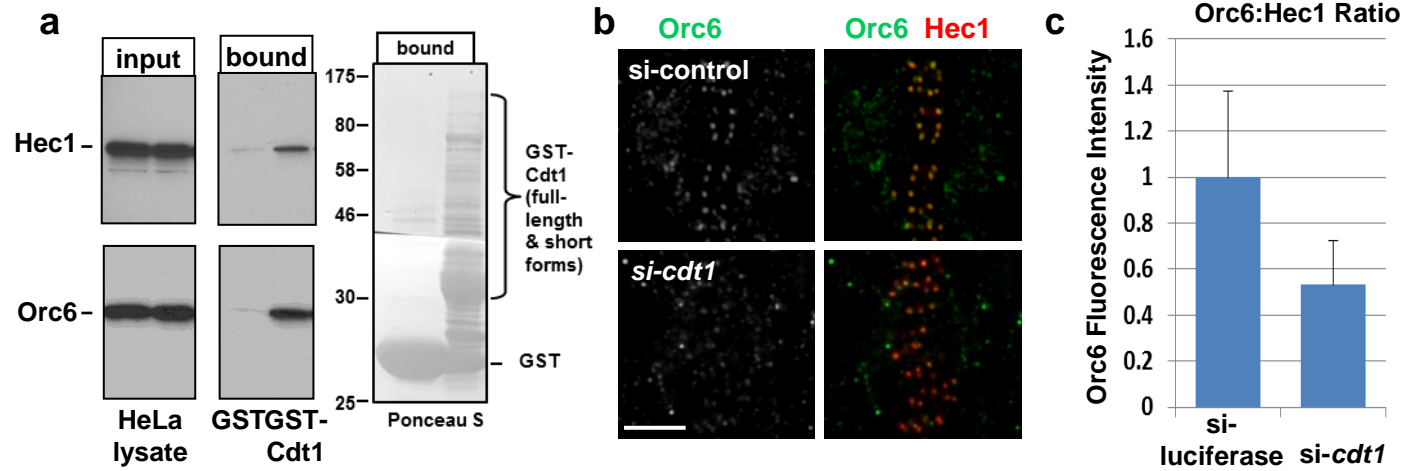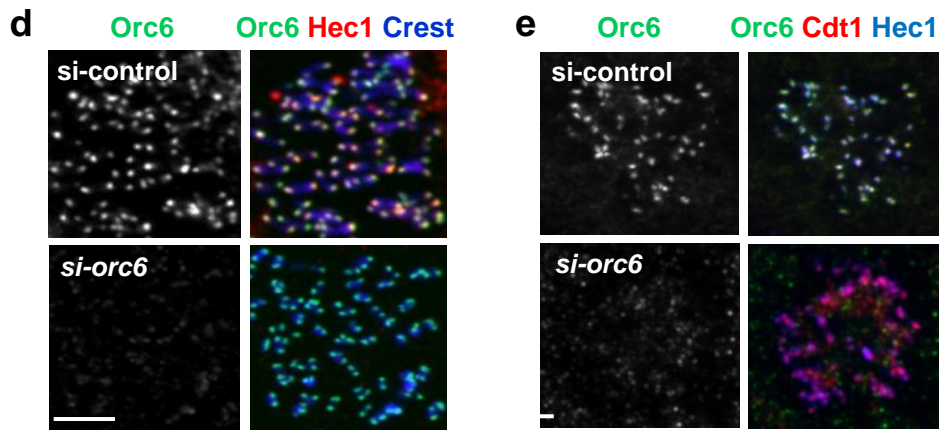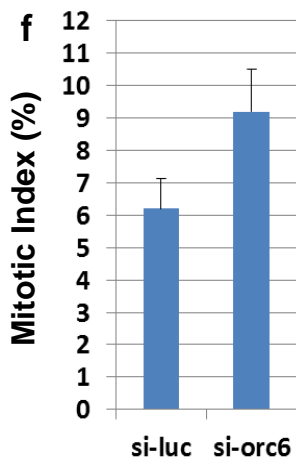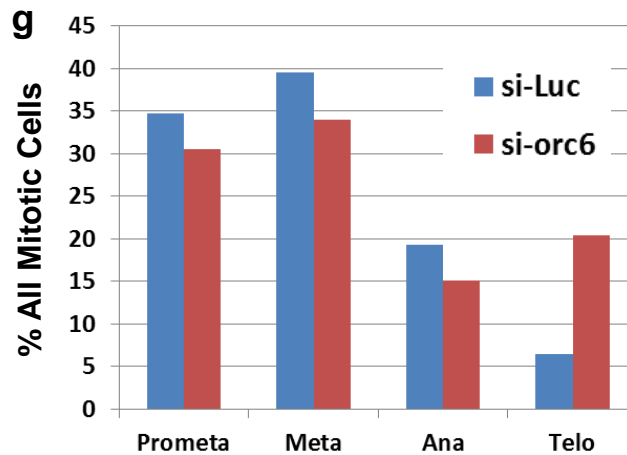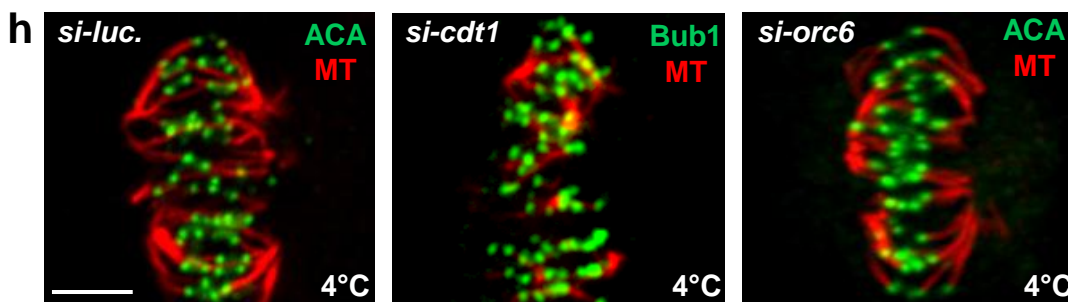

**a**

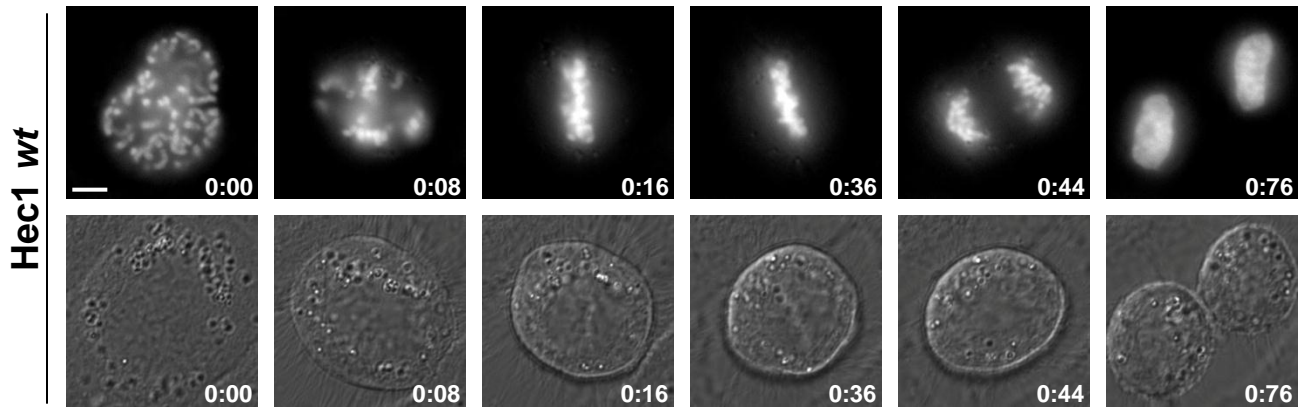

**b**

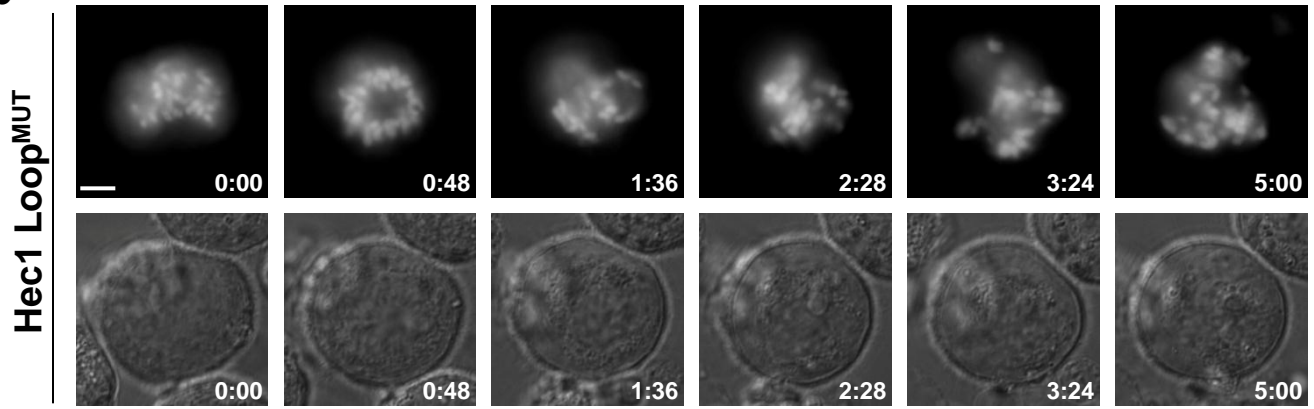

**c**

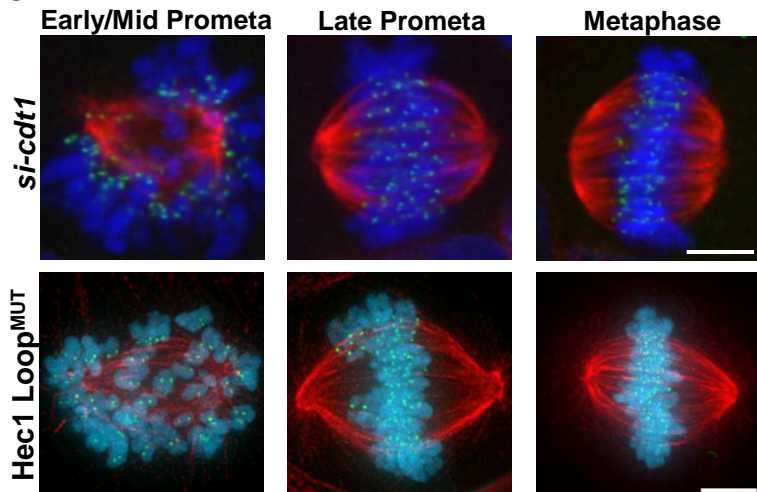

**d**

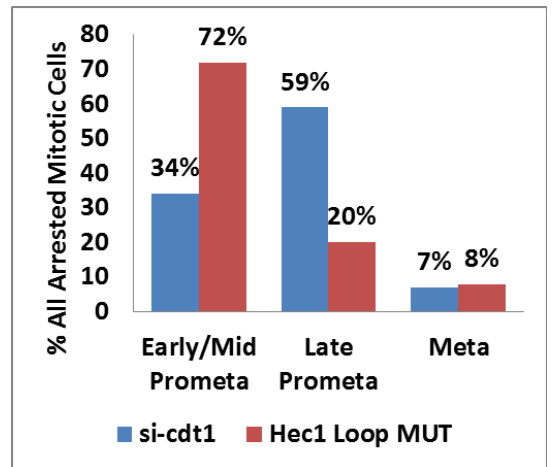

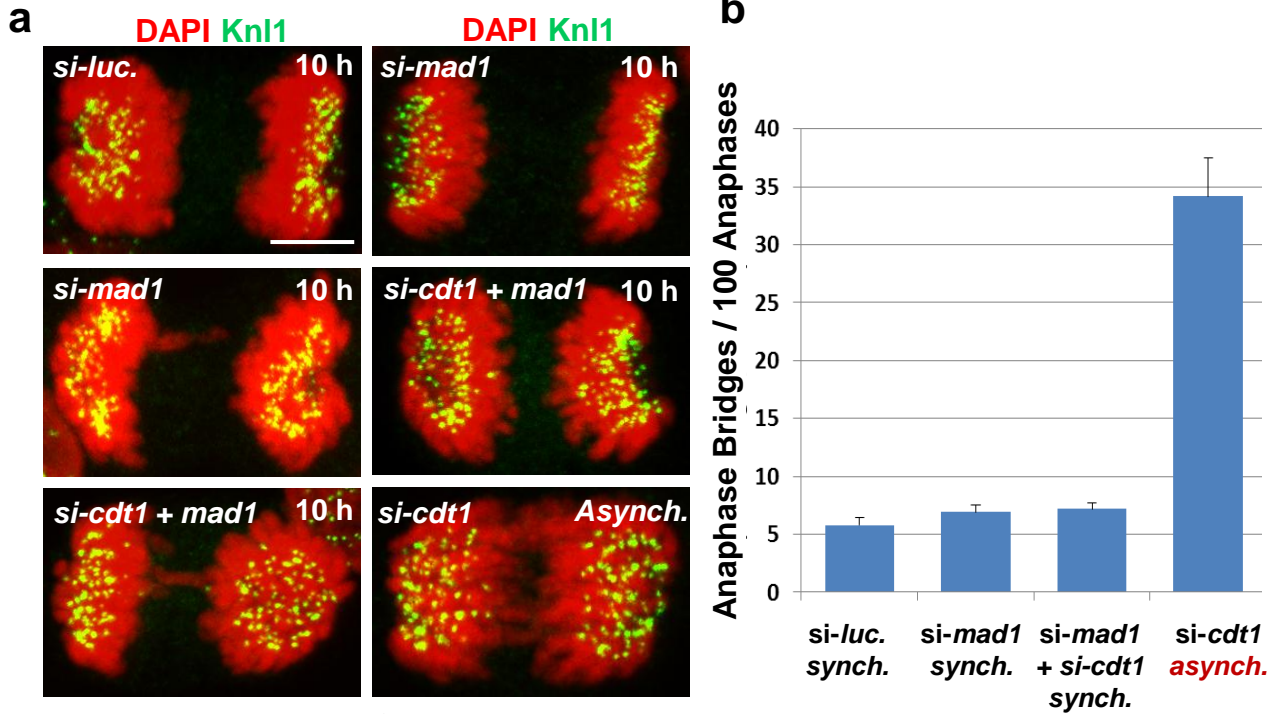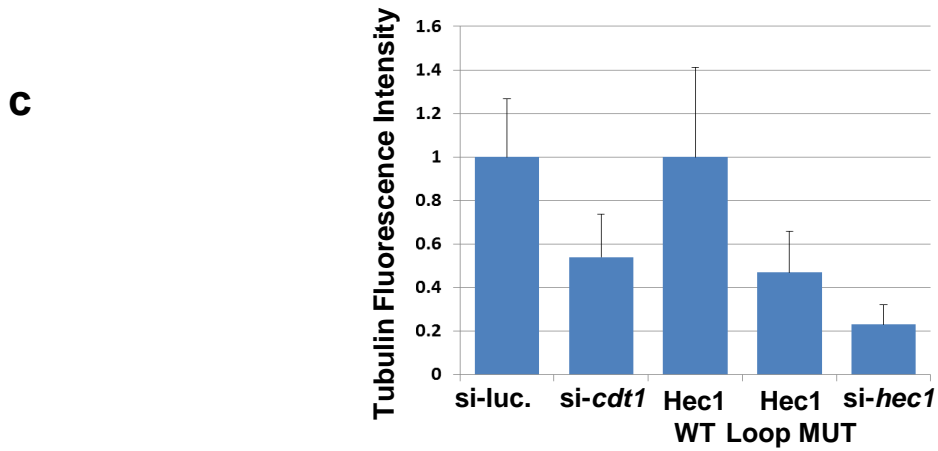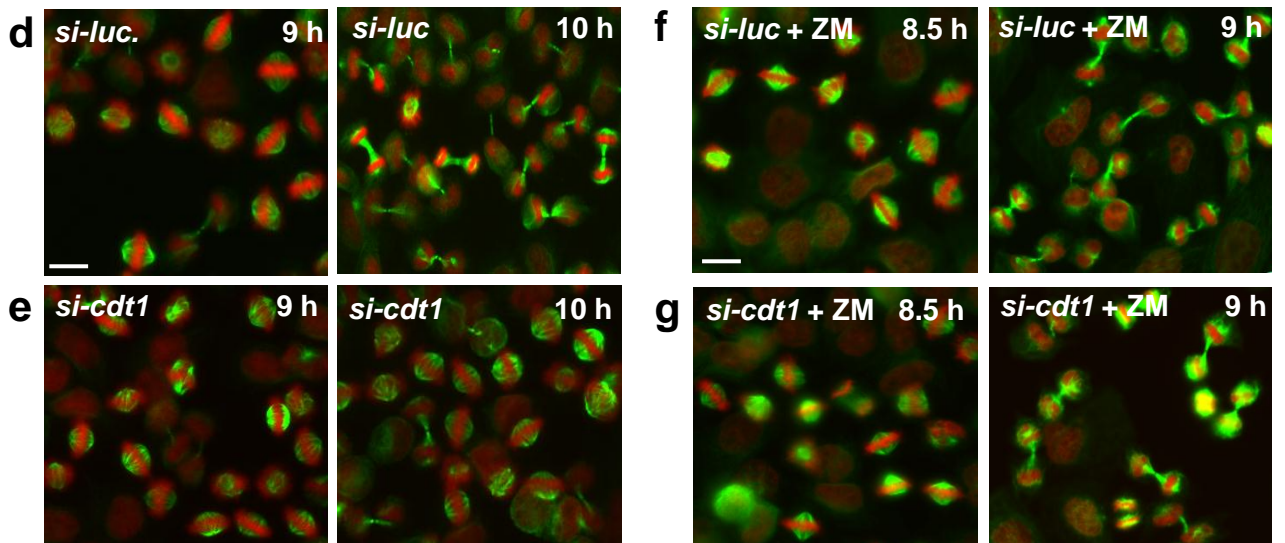

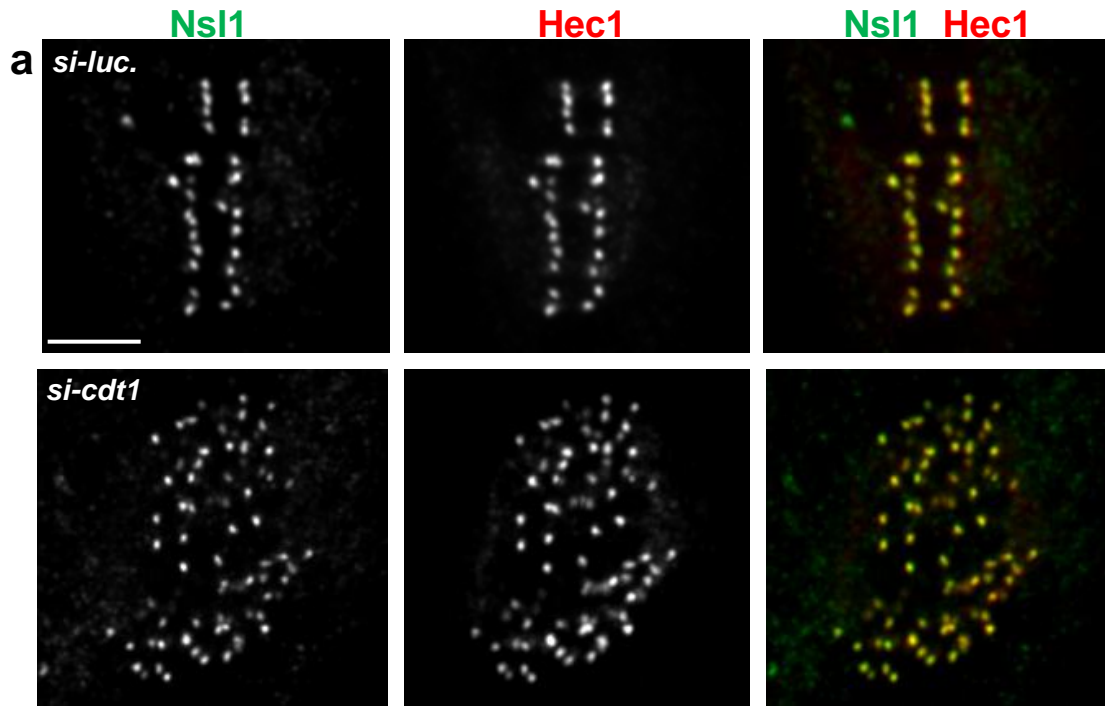

**b**

| Protein          | <i>si cdt1</i> | Hec1 loop <sup>MUT</sup> | WT |
|------------------|----------------|--------------------------|----|
| Hec1             | +              | +                        | +  |
| Spc24            | +              | +                        | +  |
| Kn11             | +              | +                        | +  |
| Zwint1           | +              | +                        | +  |
| Nsl1             | +              | +                        | +  |
| Dsn1             | +              | +                        | +  |
| Orc6             | - +            | - -                      | ++ |
| Mad1 (Meta)      | +++            | +++                      | -  |
| Ska3 (Meta)      | +              | +                        | +  |
| Dynein IC (Noco) | +              | +                        | +  |
| ZW10 (Noco)      | +              | +                        | +  |
| Spindly (Noco)   | +              | +                        | +  |
| CENP-E (Noco)    | +              | +                        | +  |
