# Supplementary material
Source: PubMed Central journal article supplement (PMC3366049)

Varma *et al.*, Supplemental Figure S9:  
uncropped immunoblots

Fig 1a

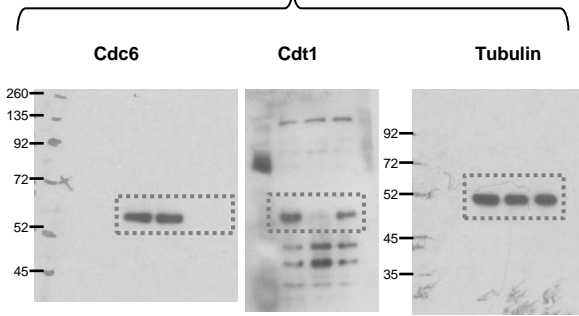

Fig 1c

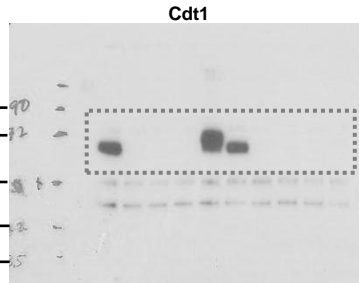

Fig 1d

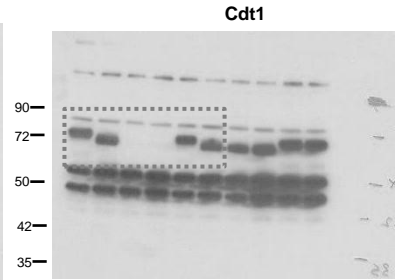

Fig 4a

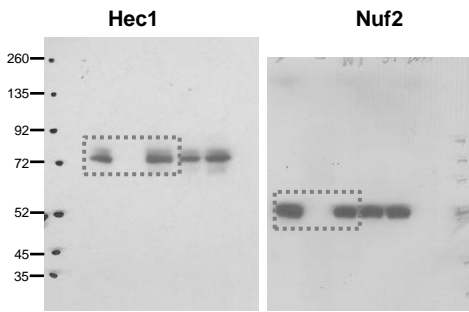

Fig. 4b and 4c

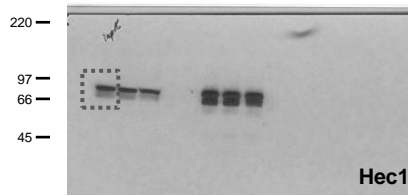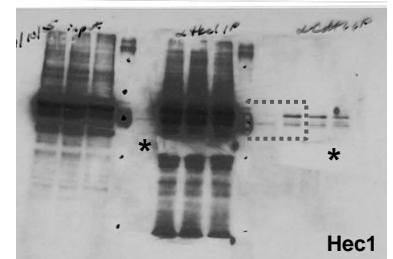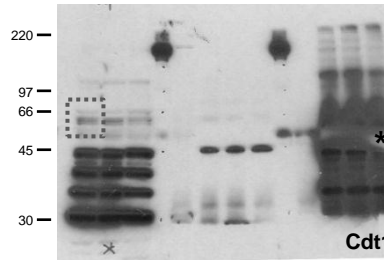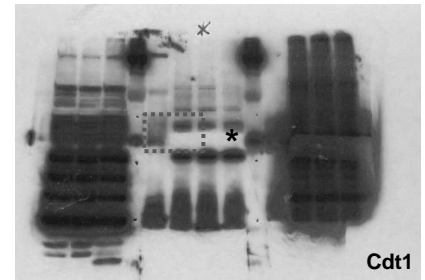

short exposure

long exposure

\* IgG heavy chain excised from blot before probing.

Fig 5b

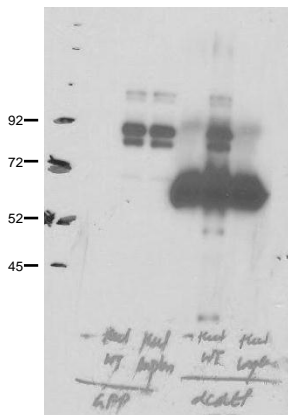

Supplement: NIHMS366583-supplement-3.pdf [file NIHMS366583-supplement-3.pdf]
