# Supplementary material
Source: PubMed Central journal article supplement (PMC3366049)

Fig 1a

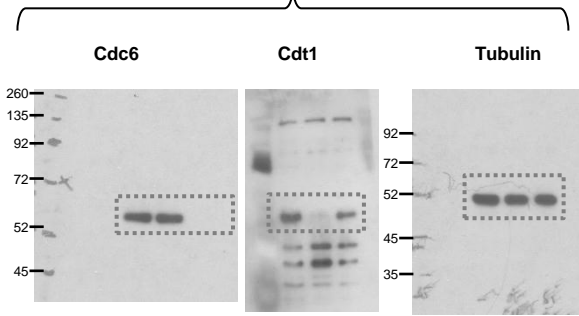

Fig 1c

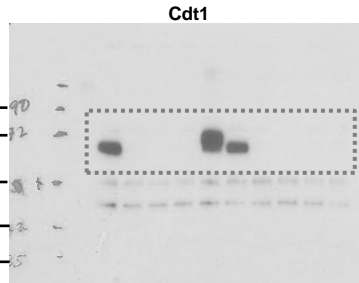

Fig 1d

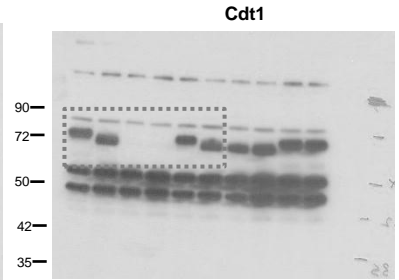

Fig 4a

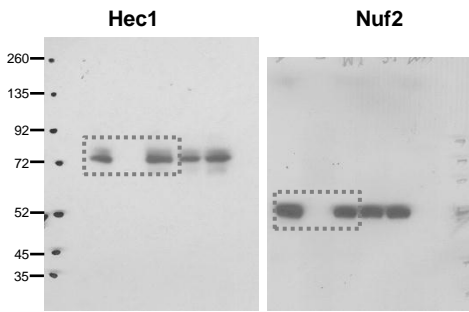

Fig. 4b and 4c

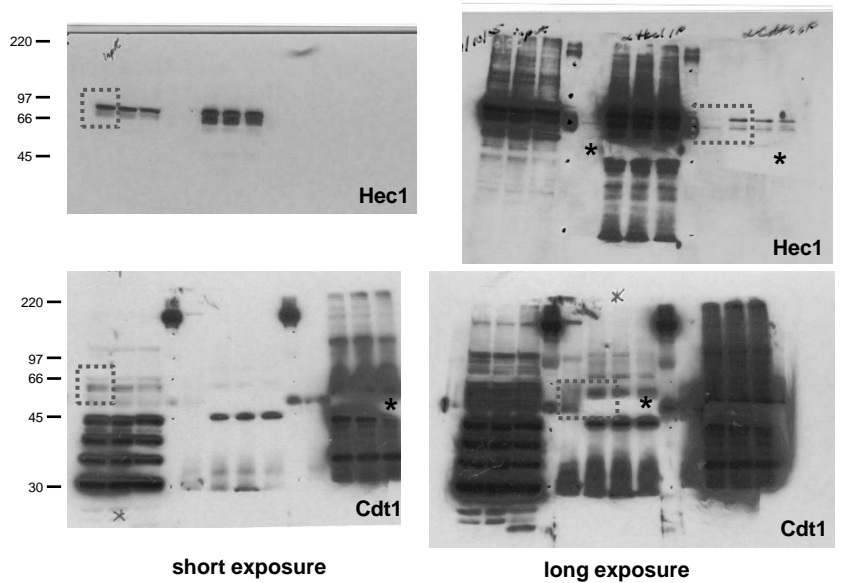

Fig 5b

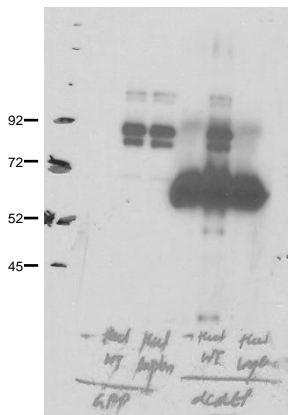

\* IgG heavy chain excised from blot before probing.

Supplement: NIHMS366583-supplement-4.pdf [file NIHMS366583-supplement-4.pdf]
